# Supplementary material for: Photoinduced triple shape memory polyurethane enabled by doping with azobenzene and GO
Source: Royal Society of Chemistry journal article supplement (doi:10.1039/c6tc03556f), 2016-01-01
Supplement: c6tc03556f1.pdf [file c6tc03556f1.pdf]

## Supporting Information

### **Photoinduced Triple Shape Memory Polyurethane Enabled by Doping with Azobenzene and GO**

Liming Zhou,<sup>a</sup> Qiang Liu,<sup>a</sup> Xuande Lv<sup>b</sup> Lijun Gao,<sup>a</sup> Shaoming Fang,<sup>a</sup> and Haifeng Yu<sup>b</sup>

<sup>a</sup> State Laboratory of Surface & Interface, Zhengzhou University of Light Industry, Zhengzhou, China, 450002.

Email: [mingfang@zzuli.edu.cn](mailto:mingfang@zzuli.edu.cn)

<sup>b</sup> Department of Material Science and Engineering, College of Engineering and Key Laboratory of Polymer Chemistry and Physics of Ministry of Education, Peking University, Beijing 100871, China

Email: [yuhai Feng@pku.edu.cn](mailto:yuhai Feng@pku.edu.cn)

### **Materials**

4-Aminoethoxybenzene, sodium nitrite (NaNO<sub>2</sub>), sodium carbonate (Na<sub>2</sub>CO<sub>3</sub>), phenol, hydrochloric acid (HCl), sodium hydroxide (NaOH), dimethylformamide (DMF), potassium carbonate (K<sub>2</sub>CO<sub>3</sub>), potassium iodide (KI) were purchased from Beijing Chemical Works. 11-Bromo-1-undecanol was purchased from J&K Scientific, Ltd.

### **Characterizations**

<sup>1</sup>H-NMR spectra were recorded on a Bruker 500MHz spectrometer to confirm the molecular structure of the synthesized EHAB. The thermal properties of EHAB was studied by differential scanning calorimetry (Perkin-Elmer DSC8000). The heating and cooling rates were 10 °C/min. The textures of EHAB was investigated and the birefringent properties of the composite films were performed using polarizing optical microscopy (POM) (ZEISS Axio Scope A1). The mechanical properties of the composite films were exhibited by

microcomputer-controlled electronic universal testing machine (CMT-10, Jinan Liangong Testing Technology Co., Ltd). Scanning electron microscopy (SEM) images were obtained on a Hitach S-4800. Two driving light sources are implemented by different instruments (UV-light: HTLD-4 II Shenzhen Height-LED Opto-electronic Tech Co., Ltd. NIR-light: MDL-H Changchun New Industries Optoelectronics Technology Co., Ltd).

**Table S1.** The components of four sample films.

| Films | Component  | PU/g | GO/mg | EHAB/mg |
|-------|------------|------|-------|---------|
| 1     | Neat PU    | 1.8  |       |         |
| 2     | PU-GO      | 1.8  | 10.3  |         |
| 3     | PU-EHAB    | 1.8  |       | 12.3    |
| 4     | PU-GO-EHAB | 1.8  | 10.3  | 12.3    |

**Table S2.** Summary of mechanical properties of the four sample films.

| Films | Component  | Length (mm) | Width (mm) | Thickness (mm) | Elongation at break (%) | Breaking stress (MPa) |
|-------|------------|-------------|------------|----------------|-------------------------|-----------------------|
| 1     | Neat PU    | 21          | 2          | 0.315          | 514                     | 21.4                  |
| 2     | PU-GO      | 20          | 2          | 0.261          | 560                     | 22.7                  |
| 3     | PU-EHAB    | 22          | 2          | 0.289          | 505                     | 13.6                  |
| 4     | PU-GO-EHAB | 20          | 2          | 0.271          | 480                     | 18.4                  |

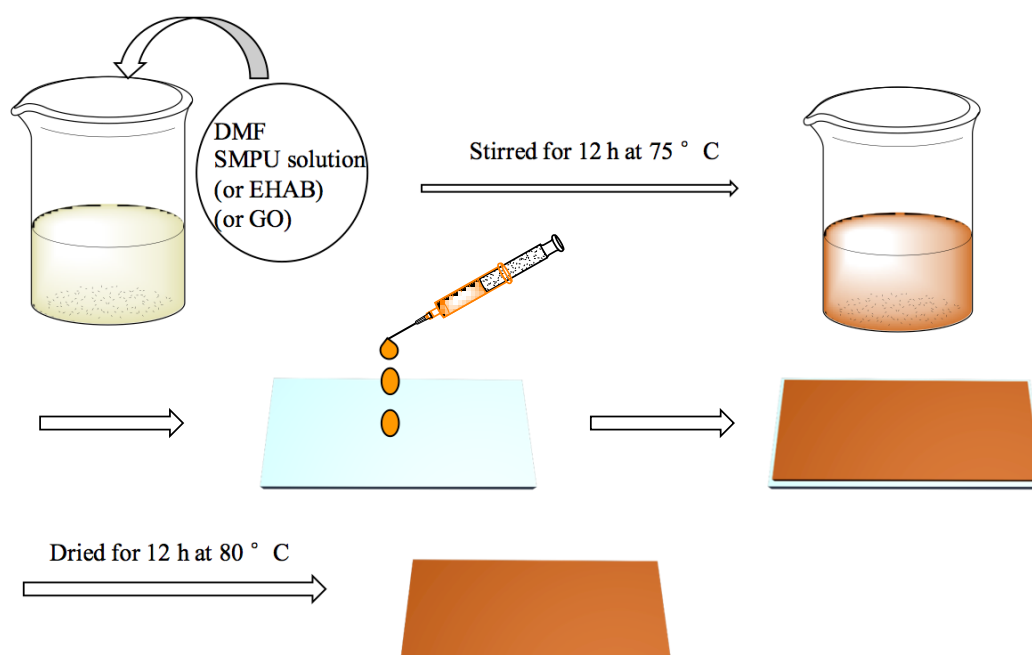

**Scheme S1.** Schematic illustration of fabrication process of the polymer composite films.

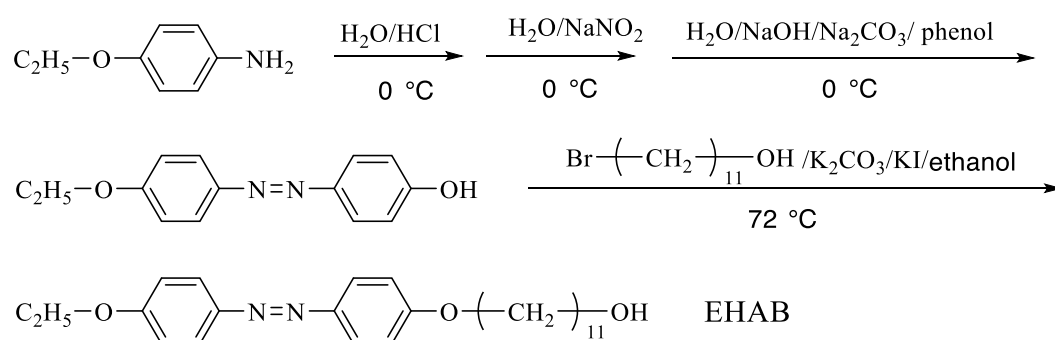

**Fig. S1:** Synthesis of 4'-ethoxy-4-(11-hydroxyundecyloxy)azobenzene (EHAB)

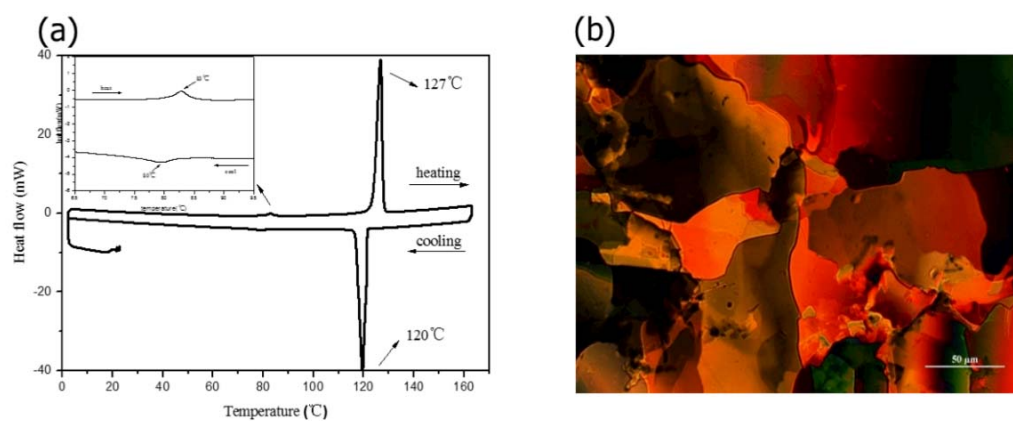

**Fig. S2.** Thermal properties of EHAB. (a) DSC curve and (b) POM image (500 ×) of EHAB at 125 °C. EHAB shows its melting point at 83 °C and clearing point at 127 °C on heating. Typical smectic liquid crystal texture was observed with POM.

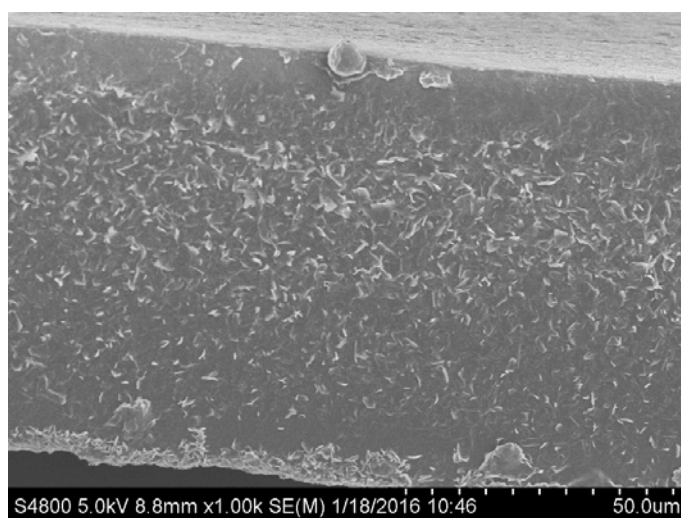

(a)

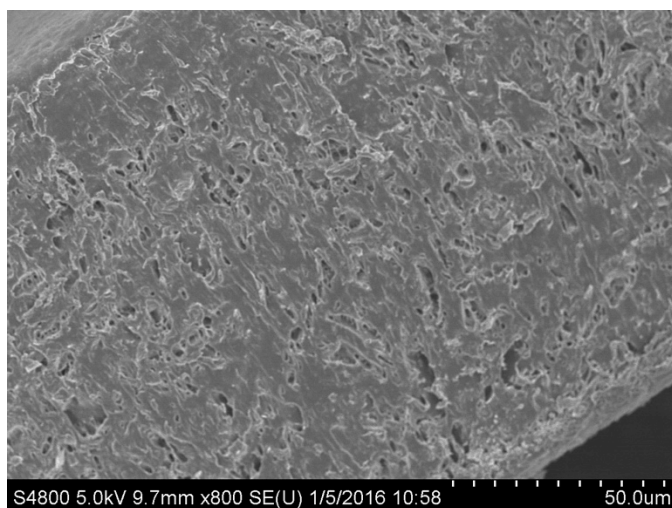

(b)

**Fig. S3.** SEM images of the cross-section of PU-GO-EHAB film (a) before and (b) after washing with ethanol to get rid of EHAB.

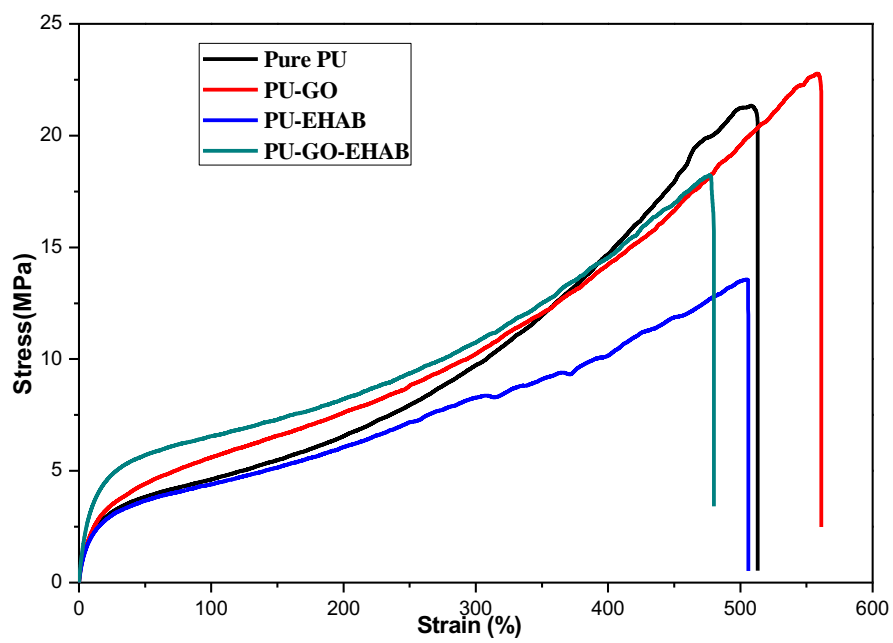

**Fig. S4.** The stress-strain curves of the four films measured at room temperature.

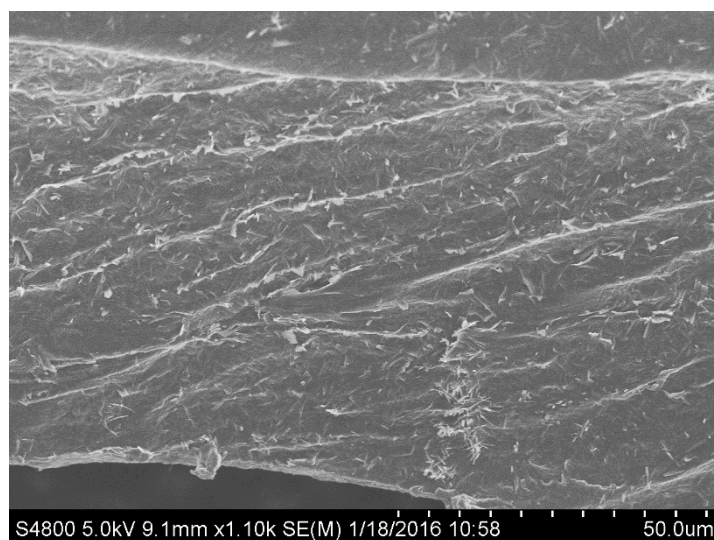

(a)

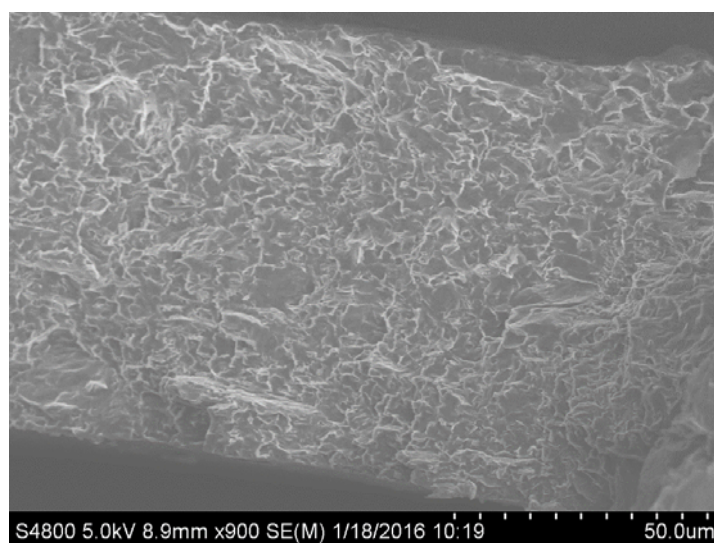

(b)

**Fig. S5.** SEM images of cross-section of stretched PU-GO-EHAB films (a) before and (b) after washing with ethanol.

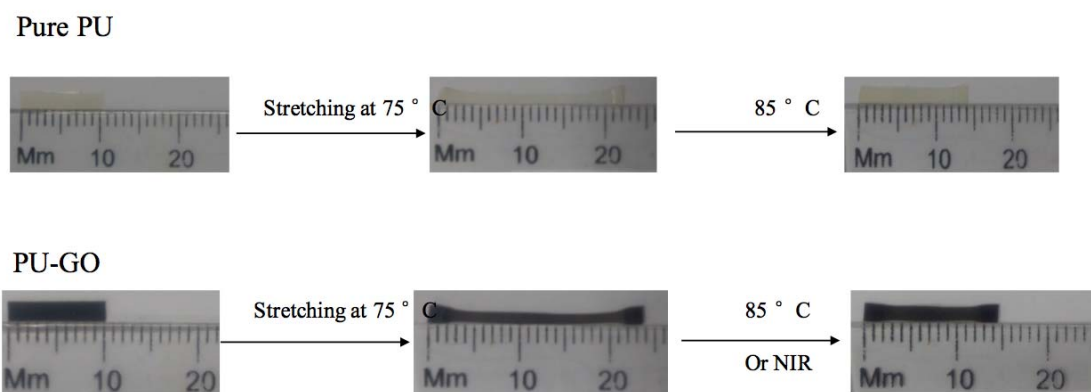

**Fig. S6.** Thermal and NIR -responsive behaviors of pure PU and PU-GO.

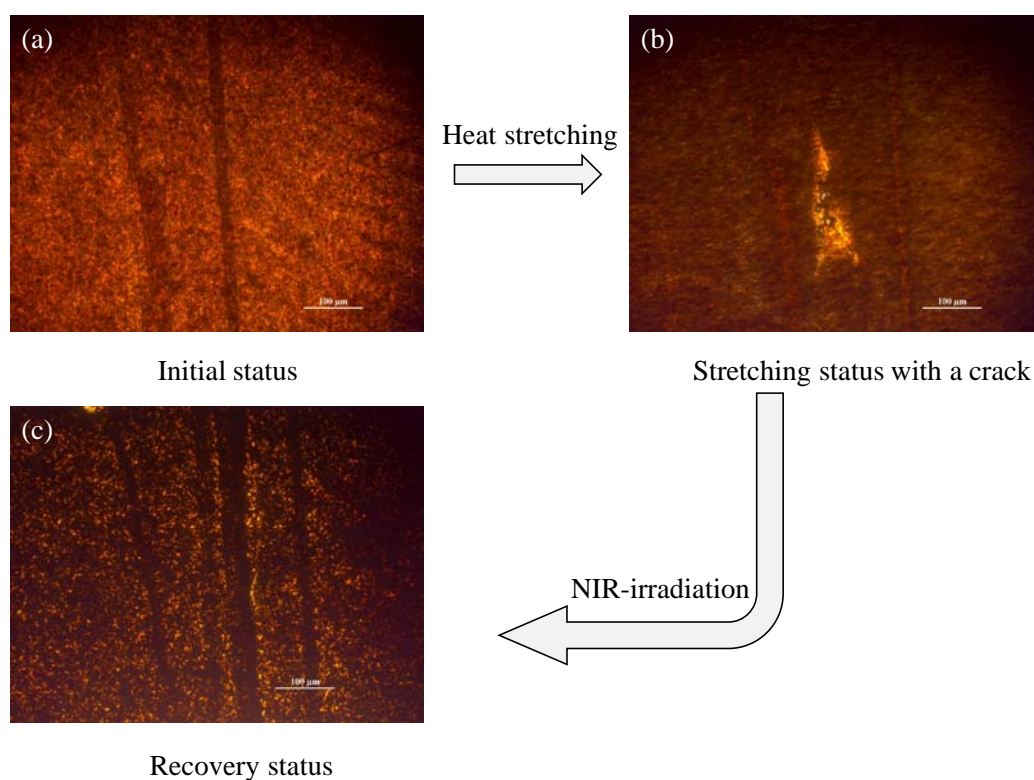

**Fig. S7.** POM images (50 $\times$ ) of self-healing property of PU-GO-EHAB film. (a) Initial status. (b) After mechanical stretching. (c) Recovery status upon exposure to NIR-light for 30 minutes.
